# Supplementary material
Source: Springer Nature journal article supplement (https://www.springermedizin.de/resource/supplementary/12957_2014_1886_MOESM6_ESM.docx/9563768)
Supplement: MOESM6 [file 9563768]

**Table1. Association of Pre-therapy Status of Tumor Markers with Clinicopathological Parameters**

| **Variable** | **Cases** | **CEA(+)**  **N (%)** | ***P* value** | **CA199(+)**  **N (%)** | ***P* value** | **CA72-4(+)**  **N (%)** | ***P* value** | **CA125(+)**  **N (%)** | ***P* value** | **Combined**  **Detection(+)**  **N (%)** | ***P* value** |
| --- | --- | --- | --- | --- | --- | --- | --- | --- | --- | --- | --- |
| **Gender** |  |  |  |  |  |  |  |  |  |  |  |
| Male | 127 | 47(39.8) |  | 32(28.1) |  | 37(35.6) |  | 14(23.3) |  | 78(66.1) |  |
| Female | 57 | 17(33.3) | 0.424 | 15(30.0) | 0.801 | 18(38.3) | 0.748 | 9(33.3) | 0.328 | 30(58.8) | 0.366 |
| **Age(y)** |  |  |  |  |  |  |  |  |  |  |  |
| ≤60 | 92 | 29(33.3) |  | 25(29.1) |  | 31(40.8) |  | 9(22.0) |  | 52(59.8) |  |
| >60 | 92 | 35(42.7) | 0.210 | 22(28.2) | 0.903 | 24(32.0) | 0.262 | 14(30.4) | 0.370 | 56(68.3) | 0.249 |
| **Differentiation** |  |  |  |  |  |  |  |  |  |  |  |
| Moderately | 30 | 18(62.1) |  | 10(38.5) |  | 5(20.0) |  | 4(28.6) |  | 21(72.4) |  |
| Poorly | 75 | 20(27.4) | **0.001** | 15(20.8) | 0.077 | 24(36.9) | 0.124 | 8(22.2) | 0.918 | 39(53.4) | 0.079 |
| Other | 29 |  |  |  |  |  |  |  |  |  |  |
| Missing Value | 50 |  |  |  |  |  |  |  |  |  |  |
| **Tumor Location** |  |  |  |  |  |  |  |  |  |  |  |
| Cardiac Carcinoma | 47 | 22(47.8) |  | 11(24.4) |  | 11(29.7) |  | 1(6.2) |  | 32(69.6) |  |
| Other Locations | 114 | 34(31.2) | **0.049** | 28(26.7) | 0.776 | 39(38.6) | 0.336 | 15(24.6) | 0.207 | 64(58.7) | 0.204 |
| Missing Value | 23 |  |  |  |  |  |  |  |  |  |  |
| **Invasion Depth(Pathological)** | | | | | | | | | | | |
| T1+T2 | 29 | 8(30.8) |  | 5(20.8) |  | 5(21.7) |  | 4(28.6) |  | 12(46.2) |  |
| T3+T4 | 146 | 53(39.6) | 0.399 | 39(29.8) | 0.372 | 47(39.5) | 0.106 | 17(25.0) | 1.000 | 90(67.2) | **0.041** |
| Missing Value | 9 |  |  |  |  |  |  |  |  |  |  |
| **Lymph Node Metastasis(Pathological)** | | | | | | | | | | | |
| Negative | 44 | 8(20.0) |  | 7(18.4) |  | 9(25.7) |  | 5(26.3) |  | 19(47.5) |  |
| Positive有移结08 保证了出勤率和工作量，并与课题组沟通良好，作量，并 | 131 | 54(45.0) | **0.005** | 37(31.6) | 0.117 | 42(39.3) | 0.147 | 16(25.4) | 1.000 | 83(69.2) | **0.014** |
| Missing value | 9 |  |  |  |  |  |  |  |  |  |  |
| **Vascular Invasion(Pathological)** | | | | | | | | | | | |
| Negative | 101 | 32(35.6) |  | 24(27.6) |  | 21(26.2) |  | 14(29.8) |  | 54(60.0) |  |
| Positive | 66 | 26(41.9) | 0.426 | 19(30.6) | 0.685 | 27(49.1) | **0.006** | 7(21.9) | 0.435 | 43(69.4) | 0.238 |
| Missing value | 17 |  |  |  |  |  |  |  |  |  |  |
| **pTNM Stage** | | | | | | | | | | | |
| I+II | 53 | 13(27.1) |  | 10(21.3) |  | 9(20.5) |  | 7(26.9) |  | 25(52.1) |  |
| III+IV | 126 | 50(43.1) | 0.055 | 36(32.1) | 0.168 | 45(44.1) | **0.007** | 14(24.1) | 0.785 | 80(69.0) | **0.040** |
| Missing Value | 5 |  |  |  |  |  |  |  |  |  |  |
| **Clinical Response** | | | | | | | | | | | |
| PR+SD | 137 | 48(36.9) |  | 35(27.6) |  | 40(34.5) |  | 16(24.6) |  | 82(63.1) |  |
| PD | 14 | 10(71.4) | **0.012** | 4(28.6) | 1.000 | 4(30.8) | 1.000 | 3(50.0) | 0.389 | 11(78.6) | 0.391 |
| Missing Value | 33 |  |  |  |  |  |  |  |  |  |  |
| **Pathologic Response** | | | | | | | | | | | |
| Complete and Partial Response | 84 | 7(24.1) |  | 6(21.4) |  | 9(32.1) |  | 4(25.0) |  | 14(48.3) |  |
| No Response | 33 | 31(39.2) | 0.145 | 21(26.6) | 0.590 | 24(32.9) | 0.944 | 12(26.1) | 1.000 | 52(65.8) | 0.097 |
| Missing Value | 67 |  |  |  |  |  |  |  |  |  |  |

* Positive of combined detection for four tumor markers was defined as one or more tumor markers were above the cut-off levels.
